# Supplementary material for: Response of soil nematode community structure, diversity, and ecological network to elevation gradients in wild fruit forest of Tianshan Mountain, China
Source: PeerJ. 2025 Oct 1;13:e20090. doi: 10.7717/peerj.20090 (PMC12495954; doi:10.7717/peerj.20090)
Supplement: Supplemental Information 1 [file peerj-13-20090-s001.xlsx]

## Sheet: Description of file content
A brief description of the file contents: The following is the original data of soil nematode communities at different altitudes in two Tianshan wild fruit forests. In this paper, two wild fruit forests of Juglans cathayensis ( JC ) and its associated species Malus sieversii ( MS ) were selected as the research objects. Since the two wild fruit forests are mainly distributed at an altitude of 120…

## Sheet: Nematode data
Nematode data in Tianshan wild fruit forest at different altitudes
					Juglans cathayensis forest																								Malus sieversii forest
	No.	Group	Trophic group	Weight	E1（148m）				E2（141m）				E3（1351m）				E4（135m）				E5（1252m）				E6（127m）				E1（148m）				E2（141m）				E3（1351m）				E4（135m）				E5（1252m）				E6（127m）
	No.		cp value		1HX1	1HX2	1HX3	1HX4	2HX1	2HX2	2HX3	2HX4	3HX1	3HX2	3HX3	3HX4	4HX1	4HX2	4HX3	4HX4	5HX1	5HX2	5HX3	5HX4	6HX1	6HX2	6HX3	6HX4	7HX1	7HX2	7HX3	7HX4	8HX1	8HX2	8HX3	8HX4	9HX1	9HX2	9HX3	9HX4	10HX1	10HX2	10HX3	10HX4	11HX1	11HX2	11HX3	11HX4	12HX1
Bacterivores	1	Rhabditis	Ba1	3.2		11.1322											4.61467			1.57172	6.12987	17.489			1.75779						4.23798					1.28381					2.62146								3.26838
	2	Pelodera	Ba1	3.2		1.47665			1.18312							1.34377													1.5868	1.18412
	3	Diploscapter	Ba1	3.2	0.613929
	4	Cephalobus	Ba2	0.8		1.47665					1.73694	3.2								1.57172	3.64936		7.26485		1.75779		3.64562			1.33758				1.79131		1.18969	4.41723	4.1789	4.62296		1.36492
	5	Eucephalobus	Ba2	0.8												2.24844			1.66238								4.69783		3.17342								2.56751
	6	Acrobeles	Ba2	0.8	4.88793	71.3526	5.83546	53.6159	5.48127	16.4328	7.85329	13.7985	11.6596	26.3563	6.8673	44.5317	6.33537	58.3514	57.9948	12.5557	16.7569	12.8925	8.83166	15.9574	8.78539	1.36766	3.64562	4.26387	17.8422	14.9954	5.29193	19.4884	21.345	41.6685	7.32718	16.5132	13.2518	5.74932	21.6954	44.9997	29.2692	24.7211	15.3442	24.1775	31.1538	15.6348	21.7121	16.3175
	7	Acrobeloides	Ba2	0.8	2.62449	5.96582	36.5172	25.9864	4.73246	8.18346	8.66295	11.3323	7.66559	7.86285	18.5123	8.52817	3.81629	15.2359	4.82525	4.77699	28.4152	12.6682	38.6927	5.71666	1.75779	2.72153	38.1939	1.23439	11.8363	7.87167	12.6826	13.6573	11.9315	5.65581	14.7287	13.8396	1.73935	1.34699	15.4484	26.7434	52.3917	11.6632	61.3577	8.98992	22.4198	5.48175	21.1176	19.9467	1.51342
	8	Cervidellus	Ba2	0.8		2.9533			35.1939	32.4334	25.5927	1.16539	16.9928	18.8785	33.4345	18.4266	3.81629	9.94294	11.5441	11.4223	7.56297		7.26485						18.1169	9.93314	7.83273	27.3147	1.43246	15.649	7.36436	9.61167	8.83447	7.32226	2.18112		43.4159	11.6632	11.9665	13.7916			4.78373	3.83194
	9	Chiloplacus	Ba2	0.8	5.7784	15.8243	1.18785	15.7723		1.95745															1.75779		6.36128				3.87521				1.2398						1.36492		1.669						2.76165
	10	panagrellus	Ba1	3.2					2.74633	1.36531	19.9639	2.33789	4.66362	19.1962	5.23563	11.6548													1.5868	27.4741					11.1581	12.6499	13.2518	1.35748	4.64194		3.98633	9.19949	3.48762
	11	Panagrolaimus	Ba1	3.2	0.613929		1.47485	6.79864			1.73694	6.99237	36.9876	42.7847	1.58722	6.27973	5.73598				22.8868	2.91483		1.42917	13.6139		1.29673	3.73163			1.48445	1.45768		1.79131	2.44239		17.3652	1.35748	32.4349		9.44624	6.82338	3.47953
	12	Teratocephalus	Ba3	1.8					1.55751																														1.53499
	13	Monhystera	Ba2	0.8															1.56984																													1.26888
	14	Geomonhystera	Ba2	0.8						1.36531
	15	Anaplectus	Ba2	0.8																		7.28779
	16	Plectus	Ba2	0.8					26.1335	16.4328	1.73694	3.63379		1.49349	1.58722	8.99375	44.3278	23.2296	1.56984				1.18677						16.5965	9.93314	1.48445	4.18914	4.13723	5.37395	6.19895	11.5544		14.2136	9.28387		7.86422	5.53719	17.1853	1.39618
	17	Wilsonema	Ba2	0.8					2.74633	5.46125		5.66616	6.99543	1.88889	7.56522	6.74531	2.37335	1.44847	3.32476										3.17342	8.74927	1.26917		2.51872	4.99659				1.46395	6.15621		1.36492	9.19949	1.73976
	18	Odontolaimus	Ba3	1.8																								1.23439
	19	Bastiania	Ba3	1.8																									1.41524								2.56751		1.53499
	20	Prismatolaimus	Ba3	1.8					3.11529	15.6596	6.94775	5.23379	12.7879	2.38238	17.5623	35.1736	73.3818	1.44847	13.1139	3.14344	5.72896	8.52238							15.3527	12.4548	3.52688	8.7466					23.2317	3.92919	6.21567		5.35125	51.1291	3.338	19.7848
Fungivores	21	Ditylenchus	Fu2	0.8	0.613929	1.47665	2.9497		1.18312																		1.29673			1.18412														1.65386				1.26888	1.51342
	22	Fungiotonchium	Fu2	0.8							1.29726
	23	Dotylaphus	Fu2	0.8										3.38238	3.15721																								1.53499
	24	Aphelenchus	Fu2	0.8	4.91143	2.63195	26.7312	17.4477	12.58	17.387	35.9766	45.3293	19.9949	3.13412	14.1678	9.43284	34.3159	14.3791	4.82525	15.1964	7.56297	23.3187	24.6993	9.8766	3.51416	1.71922	34.1553	14.8675	13.4234	19.8663	1.17563	14.3929	7.79429	24.6554	8.52978	11.3667	3.46539	16.8227	9.28387	37.9282	6.71618	2.66635	15.4456	1.39618	9.64129	11.6356	1.28862	5.34825	7.56795
	25	Paraphelenchus	Fu2	0.8					33.8992	1.95745	12.5765	1.6	64.2992	21.8573	2.83356	7.18446	11.4612	6.54515	6.46443	11.4857	24.5195		3.51324	14155647933	5.27124		8.71184	2.74913	1.41524		5.72239	1.19849	9.41345	24.3237	22.2794	2.56762	26.5341	4.72426	49.3686		6.82462	1.48242	1.669	5.99328	11.7328		2.57725	5.89367	1.51342
	26	Aphelenchoides	Fu2	0.8				1.61682	1.96252	1.36531	5.18927		15.4919		4.76167	1.34377		1.6989	1.56984		3.64936	1.45742	1.75662		3.51416	3.91537	12.7225				8.6912	12.7513	3.89715	1.79131	25.8868	3.85144	4.41723		39.9658		6.71618				7.39683		4.78373		1.51342
	27	Dorylaimoides	Fu4	3.2										1.49349	1.58722																1.26917	1.45768			4.81399	1.28381	2.28617					9.32468
	28	Tylencholaimellus	Fu4	3.2													3.42326		1.56984	1.63176					1.75779						1.48445					3.56983
	29	Tylencholaimus	Fu4	3.2						11.3336	11.2793		2.33181	4.87587	1.58722		9.22934	1.44847	4.98714	1.57172									2.83478	2.52163	2.75358	5.64682		3.58263	1.226	2.47357	6.62585	2.9279	1.53499		1.36492	1.28618	1.73976
	30	Campydora	Fu4	3.2																					1.75779						4.23798					5.41132		1.46395
	31	Diphtherophora	Fu3	1.8							6.92597		14.5358	1.88889	2.83356		5.73598												1.41524	1.33758	1.48445		3.77718	1.79131	7.25279	2.47357		2.9279			11.959	1.48242	1.84752
Plant-parasites	32	Coslenchus	PI2		9.16736	28.6919	34.9666	46.4791	7.41317	25.3572	5.21816	19.7654	19.3246	9.75174	14.1678	49.4127	1.26977	26.6274	9.41919	12.3656	36.5787	1.23316	21.6964	1.42917	1.75779	1.36766	11.5488	4.93756	15.5242	3.85914	15.6828	9.65275	54.1413	29.9795	4.92197	28.7747	4.41723	9.92822	6.15621	2.89276		9.32468	34.3	25.7786	11.7328		21.7121	1.96926	3.26838
	33	Lelenchus	PI2				1.47485																				2.34891						1.25936																1.51342
	34	Neothada	PI2		0.698276	1.47665		5.52591								2.24844															1.48445		1.37976	3.58263
	35	Boleodorus	PI2			4.42994	11.5836	27.2914	2.36624	2.73627	1.29726	3.2	25.1679	3.38238	6.45176	7.6235	6.84651	3.3978	6.27935	15.6947	9.19485		1.18677	5.46781			3.64562		9.34879	9.55789	16.3624	28.7589	2.51872	3.58263	9.69518	4.8529	4.11353	7.31974	4.62296	2.24934	14.5839	7.1962	42.1495	1.99929	1.68746	5.25774	1.24411	8.74154	6.53676
	36	Basiria	PI2			5.96582	11.5836		8.28187	1.95745	9.96161	4.8	8.49642	12.8268	2.83356	4.31297	31.8272	3.14736		11.2978	18.3896	16.3157	73.9193	22.6178	32.9417	16.3292	2.47116		3.19492	2.36825	18.8446	1.27379	29.4994	59.1787	6.68785	2.56762	8.37887	2.9279	3.88169			8.35789	6.95954	3.57965	42.239	5.75752	31.8915	53.9559	3.26838
	37	Aglenchus	PI2														3.42326	1.44847									1.29673											1.46395									1.59458
	38	Malenchus	PI2			1.47665	8.3112	8.94137	9.83932	1.74146	18.1616	24.4338	2.33181	1.88889	15.1344	1.34377	27.3162	5.79387	16.4388		2.86445		8.83166	11.4333	1.75779		12.2336	1.51474	32.2928	7.5649	6.34587	17.1193	1.25936	2.82797	24.1636	15.9366	4.11353	2.9279			3.98633	1.48242	22.5798	34.1548	8.34485	6.29217	1.85663	1.24576
	39	Tylenchus	PI2													4.49688	2.37335	1.6989									3.64562	1.51474		3.75756	2.53835	1.45768			1.2398	1.18969					2.62146	2.7686		1.65386					1.51342
	40	Filenchus	PI2						5.16867	4.9595	4.33145	9.6	1.59849	1.49349	1.21613	3.59223	17.1918	6.29472	3.23222	46.7523	3.64936		1.18677	2.85833			1.17446		4.58866	2.36825	12.9292	16.3888	5.27622	6.78789	13.4146	5.94847	2.28617	2.9279			9.22915		13.4227	11.9866	24.7152	1.25843	8.64954	8.88218	6.53676
	41	Cephalenchus	PI2														3.42326
	42	Amplimerlinius	PI3																			1.45742
	43	Geocenamus	PI3																																	5.13525
	44	Merlinius	PI3		12.7612	51.5183	13.8879	26.3568	12.4612	78.3894		21.2338	7.54924	18.9988	14.8618	4.93597	45.6245	46.2628	6.1199	67.3224	18.1891	8.29598	14.2413	6.64814	5.27124	7.99767	17.1759	1.23439	11.8363	3.55237		3.82137	21.4656	7.44713	1.2398	18.6925	16.7577	14.1712	4.64194	61.6534	13.1729	13.1455	5.21929	1.39618	23.7265	26.8223	8.95551	35.6348	7.56795
	45	Nagelus	PI3		2.94828		1.36727		2.74633								4.61467		4.82525		1.43223			1.42917	1.75779	2.72153	16.4944					1.92586	1.25936	1.79131		8.42198									18.7725		1.59458	16.4121
	46	Dolichorhynchus	PI3																	3.14344
	47	Quinisulcius	PI3						3.11529	1.56415		5.23379	1.59849	3.38238	4.39578	2.68753		5.96686	6.37189	6.42463							2.47116	1.51474	6.17537	1.33758		1.27379					14.5491	5.74932	1.55392								1.59458	5.34825
	48	Tylencholaimus	PI3								1.42163			7.16158		3.59223		3.14736	3.32476	1.63176		1.23316					2.59347		1.5868					1.41395	1.226			8.3578
	49	Helicotylenchus	PI3				5.79182		1.96252	4.68874	4.33145	5.26158		24.7747	12.9352	49.4127	5.73598		1.56984		1.25585	8.7445	3.51324	7.14583	14.4263	9.52536	14.7471	9.48177	5.83243	2.67516		3.82137	2.63811	5.65581		2.37939	35.1166	8.67722	6.19585	19.2754	59.9338	3.45456	17.3269	69.9995	4.69312		1.59458	1.5416
	50	Pararotylenchus	PI3				12.8433		2.74633	1.95745	1.29726	34.4325		1.49349	4.86454	3.59223											1.17446	1.51474	1.78145	1.33758	1.26917	1.27379	4.17186	2.82797			24.8329	14.6395			23.7194	6.82338	5.14852	12.9738					1.51342
	51	Rotylenchus	PI3		0.698276	1.47665	1.36727		8.2219	1.95745	6.94775	32.8325		6.76476	1.47125	1.33752					1.43223	15.1345	2.94339	8.575	1.75779	7.99767	1.17446		3.19492	1.33758	2.75358	1.45768	2.75815	2.82797		1.18969	26.7378	13.1755			19.9316	2.7686	5.14852	1.38623
	52	Rotylenchulus	PI3				7.15987			1.36531	7.36565		2.33181	1.88889				5.96686			1.43223		1.18677	2.69483				1.51474									4.11353	4.72426
	53	Pratylenchus	PI3											1.49349	1.58722	2.24844			1.56984	1.57172									1.78145			1.27379
	54	Heterodera	PI3											1.49349
	55	Criconemella	PI3		31.1791	23.9441	2.84212	2.54545		2.73627		3.2			1.21613			3.14736			5.72896		1.18677	3.54953			9.51791	1.32282	16.7679	9.62638	25.8361					3.66321	4.11353								25.77	11.3259	2.92361	2.84756	75.5156
	56	Criconemoides	PI3		0.698276					1.95745					1.58722											13.2738	5.87228		1.41524	2.52163	1.26917														5.23286		2.57725	2.53777	4.54257
	57	Ogma	PI3						7.38775	11.5146	4.77113	26.8992		5.97396	5.23563			2.89693				27.1295		1.18318						5.19665	1.48445	1.27379	5.27622	4.24186	1.226	4.75878	12.3459						6.81752	8.58169					4.54257
	58	Crossonema	PI3							1.36531																										4.75878
	59	Hemicriconemoides	PI3		0.698276					7.41871		4.8																									8.22759
	6	Macroposthonia	PI3									1.6									7.16113		1.18677	18.2664					39.9262	23.1119	33.8594	1.45768													2.61643	33.9777	6.49963	26.6465
	61	Hemicycliophora	PI3		0.698276									1.49349	3.17444					1.57172				1.42917			1.17446															1.48242	3.47953
	62	Paratylenchus	PI2		35.6826	75.782	35.4727	34.5775	49.572	19.7555	64.9936	1.6	86.3814	16.8238	24.3227	36.2817	75.5349	5.35779	82.3752	67.1756	79.3739	19.9554	67.5987	11.7784	19.3279	2.72153	16887122945	21.5453	4.24572	45.3894	8.45544	27.3124	49.1638	46.6647	1.2398	2.22486	71.8213	69.7637	41.6783	45.5463	42.5931	2.16514	18.5559	1.39618	56.7253	149.213	38.2227	17.3136	11.3118
	63	Paratrichodorus	PI4								1.73694
Predators-Omnivores	64	Mylonchulus	Pr4	3.2												2.24844	12.5771		4.79597		65.5954																				7.86422	2.57236
	65	Mesodorylaimus	Pr5	5																	1.43223										1.48445	1.45768											1.73976
	66	Laimydorus	Pr5	5		1.47665																						3.29478
	67	Pungentus	Pr4	3.2				3.41546													3.64936	5.15689			11.8568		1.29673										2.56751					2.96484			19.2826	1.48244	7.97288	6.34442
	68	Thonus	Pr4	3.2								2.33789			1.21613			1.6989											4.24572	1.33758	1.39834	8.15118	1.37976						1.55392
	69	Eudorylaimus	Pr4	3.2																					1.75779			1.23439																	23.4657
	70	Dorydorella	Pr4	3.2										1.88889											1.75779																			1.39618
	71	Microdorylaimus	Pr4	3.2			1.36727	7.23365					3.8328		1.21613	1.34377	2.37335				8.99432	1.23316			3.51416		1.29673		1.5868		4.23798	1.45768			1.226				6.15621	18.9215					1.38214			1.26888
	72	Paraxonchium	Pr5	5								1.6		11.2452						4.89529	6.12987	1.45742		4.38648	1.75779				1.41524		1.26917		1.37976		2.45199	1.18969	4.41723	1.46395			2.72985	1.28618			2.34657			1.26888
	73	Torumanawa	Pr5	5									4.66362					1.44847			1.43223									2.52163	1.26917	2.91535	1.37976			1.18969		1.46395				2.7686	1.73976
	74	Sectonema	Pr5	5																																							1.73976
	75	Axonchium	Pr5	5																		1.45742									1.48445
	76	Dorylaimellus	Pr5	5					1.55751	11.9257	1.39984	5.66616	2.33181	1.88889		2.24844	3.42326	1.64121		9.41686	1.43223								2.83478			1.23736	1.25936	4.24186	1.226	9.89427	6.32212	4.28537	1.55392		2.72985		3.48762	1.39618
	77	Discolaimium	Pr5	5	1.22786	1.47665	2.84212	5.96913		1.36531	4.77113	2.33789		1.49349	4.39578	5.84645	2.37335	3.14736	8.34269	1.57172	12.5926	1.23316	1.18677	9.56468	4.82847	7.99767	7.7822	3.29478		1.33758	2.75358			2.82797		6.13678	6.47399	4.39184	6.21567	15.912	3.98633		1.669				3.18915		2.49647
	78	Discolaimus	Pr5	5																									1.5868	4.12525		1.45768	1.25936	1.79131		1.18969							1.669
	79	Monochromadora	Pr3	1.8	2.45571	1.47665	2.73454		1.18312				4.66362										2.37353				1.29673		3.17342
	80	Parkellus	Pr4	3.2																	1.43223				7.45784																				1.38214
All nematodes		Total individuals			19	21	22	16	28	32	29	30	25	35	34	32	29	28	26	24	32	22	22	22	26	13	33	19	36	33	38	33	28	29	26	35	33	32	27	10	29	28	31	22	22	12	22	23	20
All nematodes		Total group number			118.957	313.482	230.292	289.574	256.538	316.048	285.483	311.124	384.678	295.078	245.564	350.693	454.495	262.819	269.686	315.763	416.235	196.588	295.448	1.41556e+10	157.174	79.6559	1.68871e+10	82.0004	284.105	253.727	231.516	246.521	254.972	320.742	190.407	229.735	392.262	248.145	291.649	276.122	399.104	214.74	333.422	254.862	356.46	274.139	198.336	245.835	149.779
Bacterivores		Total individuals			14.5187	110.181	45.0154	102.173	82.8897	99.2913	74.2314	53.3602	97.7526	120.843	92.3518	143.926	144.401	109.657	95.6049	35.042	91.13	61.7747	63.2409	23.1033	29.4304	4.08919	57.8409	10.4643	90.6803	93.9332	41.6854	74.8538	41.3649	76.9264	50.4595	66.6423	87.2266	40.9191	105.75	71.7431	158.441	129.936	119.568	68.14	53.5736	21.1166	47.6135	41.365	7.54345
Fungivores		Total individuals			5.52536	4.1086	29.6809	19.0646	49.6248	32.0433	73.2449	46.9293	116.654	36.632	30.9283	17.9611	64.1657	24.0716	19.4165	29.8856	35.7318	24.7761	29.9692	1.41556e+10	15.8151	5.6346	56.8864	17.6166	19.0886	24.9096	26.8188	35.4472	24.8821	56.1444	69.9888	32.9979	43.3288	28.8667	101.688	37.9282	33.5809	16.242	20.7019	9.04331	28.771	11.6356	8.6496	12.5108	12.1082
Plant-parasites		Total individuals			95.2299	194.762	148.652	151.718	121.283	171.422	131.835	198.893	154.78	121.086	115.456	177.119	225.181	121.154	141.526	234.952	186.683	99.4994	198.678	106.506	78.9983	61.9344	1.68871e+10	46.0955	159.493	125.562	149.115	119.543	182.067	178.81	65.0545	110.494	241.925	166.754	68.7309	131.617	189.772	58.9694	181.108	174.886	226.256	239.905	130.911	183.077	127.631
Predators-Omnivores		Total individuals			3.68357	4.42994	6.94393	16.6182	2.74063	13.291	6.17098	11.9419	15.4919	16.5165	6.82805	11.6871	20.7471	7.93594	13.1387	15.8839	102.69	10.538	3.5603	13.9512	32.9306	7.99767	11.6724	7.82396	14.8428	9.32204	13.8971	16.6769	6.65799	8.86115	4.90399	19.6001	19.7809	11.6051	15.4797	34.8334	17.3102	9.59197	12.0449	2.79235	47.8591	1.48244	11.162	8.88218	2.49647
[truncated: 3 more columns]
